# Supplementary material
Source: publisher figshare collection journal article supplement (https://acs.figshare.com/ndownloader/files/4161256)
Supplement: Supplementary file 1 [file 4161256]

**Supplementary table 1:**

Glycolysis and OXPHOS associated proteins altered in cortex of 1 month old APP23 as compared to wildtype mice.

| <b>Glycolysis associated proteins (gene name)</b> | <b>Number of changed spots and direction of expression change</b> |
|---------------------------------------------------|-------------------------------------------------------------------|
| Glyceraldehyde phosphate dehydrogenase (Gapdh)    | 1xdown                                                            |
| Triosephosphate isomerase (Tpi1)                  | 1xup                                                              |
| Phosphoglycerate kinase 1 (Pgk1)                  | 1xdown                                                            |
| Phosphoglycerate mutase (Pgam5)                   | 1xup                                                              |
| Enolase (Eno1, Eno2)                              | 2xup                                                              |
| lactate dehydrogenase A (Ldha)                    | 1xup                                                              |
| lactate dehydrogenase B (Ldhb)                    | 2xdown                                                            |
| <b>OXPHOS associated proteins (gene name)</b>     |                                                                   |
| ATP Synthase<br>(Atp5a1, Atp5h, Atp6v1a)          | 3xup, 1xdown                                                      |
| NADH Dehydrogenase (Ndufb9)                       | 1xdown                                                            |
